# Supplementary material
Source: PubMed Central journal article supplement (PMC5786794)
Supplement: AAC.02222-17_zac002186862s1.pdf [file AAC.02222-17_zac002186862s1.pdf]

## Supplementary Material

### Revisiting activation of and the mechanism of resistance to the compound IQG-607 in *Mycobacterium tuberculosis*

Bruno L. Abbadi,<sup>a,b</sup> Anne D. Villela,<sup>a#</sup> Valnês S. Rodrigues-Junior,<sup>a</sup> Fernanda T. Subtil,<sup>a,b</sup> Pedro F. Dalberto,<sup>a,b</sup> Ana P. S. Pinheiro,<sup>a,b</sup> Diógenes S. Santos,<sup>a,c,†</sup> Pablo Machado,<sup>a,c</sup> Luiz A. Basso,<sup>a,b</sup> Cristiano V. Bizarro<sup>a,b#</sup>

<sup>a</sup>Instituto Nacional de Ciência e Tecnologia em Tuberculose (INCT-TB), Centro de Pesquisas em Biologia Molecular e Funcional, Instituto de Pesquisas Biomédicas, Pontifícia Universidade Católica do Rio Grande do Sul, PUCRS, Av. Ipiranga 6681 – Prédio 92A TECNOPUC, 90619-900, Porto Alegre, RS, Brazil.

<sup>b</sup>Faculdade de Biociências, Pontifícia Universidade Católica do Rio Grande do Sul, Av. Ipiranga, 6681 – Prédio 12, 90619-900, Porto Alegre, Brazil.

<sup>c</sup>Faculdade de Farmácia, Pontifícia Universidade Católica do Rio Grande do Sul, Av. Ipiranga, 6681 – Prédio 12, 90619-900, Porto Alegre, Brazil.

†Deceased.

#Address Correspondence to Anne D. Villela, [annevillela@gmail.com](mailto:annevillela@gmail.com) or Cristiano V. Bizarro, [cristiano.bizarro@pucrs.br](mailto:cristiano.bizarro@pucrs.br).

#### **Contents:**

- Supplementary Fig. S1
- Supplementary Fig. S2
- Supplementary Fig. S3
- Supplementary Table S1
- Supplementary Table S2

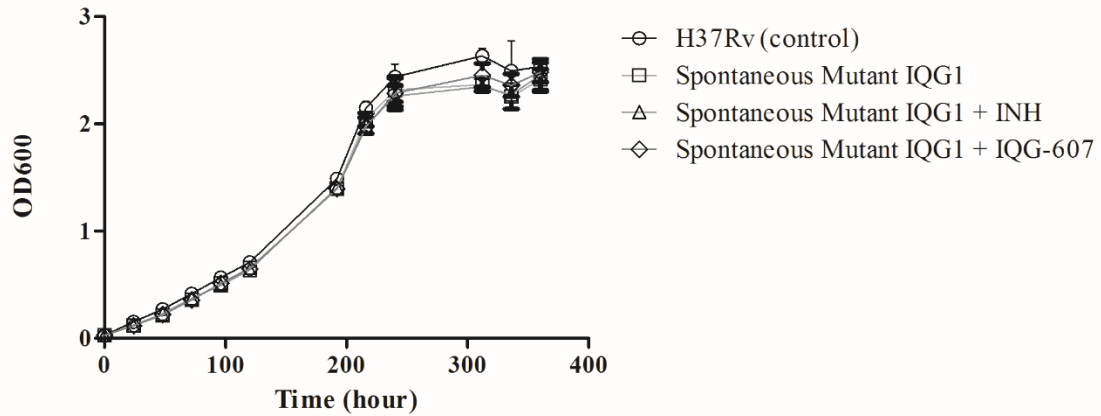

**Supplementary Fig. S1.** Growth monitoring of the spontaneous mutant selected with IQG-607 (IQG1) in the absence (square) or in the presence of 16 mg/L of INH (triangle) or IQG-607 (diamond) over 15 days. H37Rv strain (circle) was used as a positive growth control of the experiment. The data were expressed as a mean value of triplicate optical density (OD<sub>600</sub>) measurements. Two-way ANOVA with Bonferroni's post hoc test was employed to compare the growth of this mutant between the treatments.

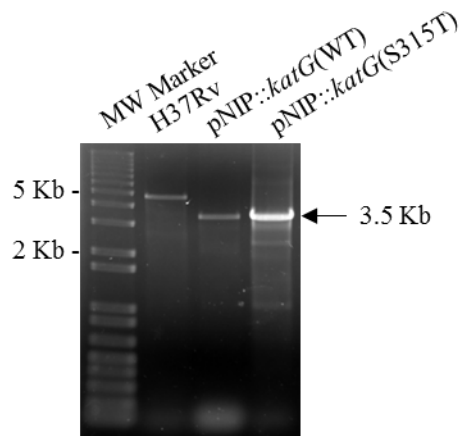

**Supplementary Fig. S2.** Standard PCR confirming the disruption of the *katG* gene by the AES (allelic exchange substrate). The exchange of the WT *katG* by the AES, which contains the kanamycin gene resistance, reduces the original sequence size from 5.0 Kb to approximately 3.5 Kb. MW Marker = 1 Kb Plus DNA Ladder (Thermo Fisher).

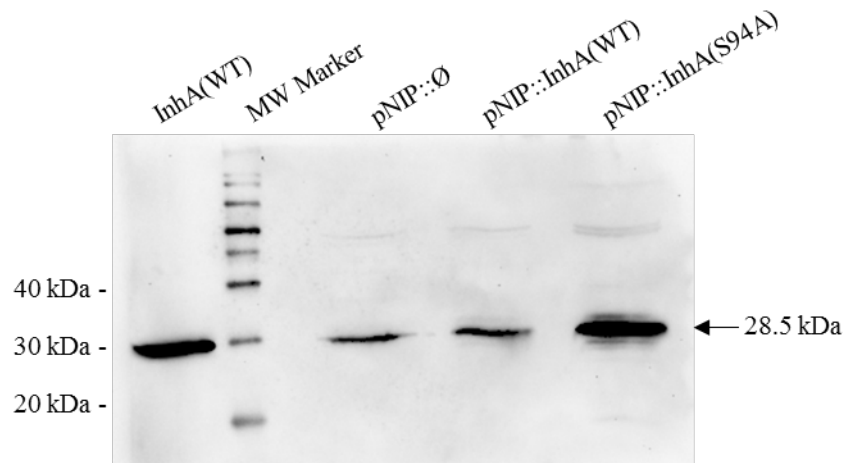

**Supplementary Fig. S3.** Western Blot of cell extracts from *M. tuberculosis* strains overexpressing the InhA(WT) or InhA(S94A) enzymes. Each culture was grown until reach an OD<sub>600</sub> between 0.8 and 1.0. Protein extraction and Western Blot assay were performed as previously described (1). Each well was loaded with 0.5 µg of protein extracts. The purified WT InhA protein (0.5 µg) with 28.5 kDa was obtained as described elsewhere (2), and was used as a positive control of the experiment. MW Maker = MagicMark XP Standard (Thermo Fisher). There was an increase of 1.5- and 3.7-fold in the InhA(WT) and InhA(S94A) expression, respectively, when compared to the underlying levels of the wild-type enzyme (pNIP::Ø).

1. Villela AD, Rodrigues VD, Pinto AF, Wink PL, Sánchez-Quitian ZA, Petersen GO, Campos MM, Basso LA, Santos DS. 2017. Characterisation of iunH gene knockout strain from *Mycobacterium tuberculosis*. Mem Inst Oswaldo Cruz 112:203–208.
2. Basso LA, Zheng R, Musser JM, Jacobs WR, Blanchard JS. 1998. Mechanisms of isoniazid resistance in *Mycobacterium tuberculosis*: enzymatic characterization of enoyl reductase mutants identified in isoniazid-resistant clinical isolates. J Infect Dis. 178:769-75.

**Supplementary Table S1.** Primers used in this study.

| Name                                | Sequence                                      | Purpose                                                    |
|-------------------------------------|-----------------------------------------------|------------------------------------------------------------|
| KatG_F_SEQ                          | ATCGATGGGCTTCAAGACGT                          | Primers for <i>katG</i> sequencing                         |
| oligo_SEQ_R_001_katG                | ATCAGCTTGTACCAGGCCTT                          |                                                            |
| SEQ_F_008_katG                      | GGAGGTCATCTACTGGGGTC                          |                                                            |
| SEQ_R_009_katG                      | ACGTAGATCAGCCCCATCTG                          |                                                            |
| SEQ_F_014_katG                      | CTGGAACACCCCGAGGAAT                           |                                                            |
| SEQ_R_015_katG                      | ATGTTCGAGCAGGTTACGAA                          |                                                            |
| PCR_R_013_KO_katG                   | AGACCAACCGTGTAGGCAAA                          | Primers for <i>inhA</i> promoter sequencing                |
| SEQ_F_002_Prom_fabG-<br><i>inhA</i> | CTCGATGACGCAGATCTCGT                          |                                                            |
| SEQ_R_003_Prom_fabG-<br><i>inhA</i> | GTCACATTCGACGCCAAACA                          | Primers for <i>inhA</i> ORF sequencing                     |
| SEQ_F_004_ORF_ <i>inhA</i>          | TGCGAGCTATATCTCCGGTG                          |                                                            |
| SEQ_R_005_ORF_ <i>inhA</i>          | CAGGACGGCATCAAATTGCA                          | Primers for WT <i>inhA</i> PCR                             |
| PCR_ <i>inhA</i> _WT_F_006          | tttcatatgATGACAGGACTGCTGGACG                  |                                                            |
| PCR_ <i>inhA</i> _WT_R_007          | tttaagctttctagaCTAGAGCAATTGGGTGTGCG           | Primers for <i>inhA</i> site-directed mutagenesis          |
| t280g_sense_MUT_S94A                | CGACGGGGTGGTGCATGCGATTGGGTTC                  |                                                            |
| t280g_antisense_MUT_S94A            | TGAACCCAATCGCATGCACCACCCCGTCG                 | Primers for PCR of the up/downstream <i>katG</i> sequences |
| K_ <i>katG</i> _UF                  | ttttGAATTCTGGTGGTTCGGCAAG                     |                                                            |
| K_ <i>katG</i> _UR                  | ttttgcatgCGGCCGTCCGGAGCTGTTC                  |                                                            |
| K_ <i>katG</i> _DF                  | ttttgcatgcGCCTGGGACAAGGTGATGAa                |                                                            |
| K_ <i>katG</i> _DR                  | ttttaagcttactagTGGGCTTGTTTCGATCCCCATA         | Primers for <i>katG</i> knockout confirmation              |
| PCR_F_010_KO_ <i>katG</i>           | GGACTGTACGTGCACTGGAT                          |                                                            |
| PCR_R_011_KO_ <i>katG</i>           | ATGTCAATCCCCACCGCATA                          | Primer for <i>furA+katG</i> operon PCR                     |
| C_ <i>katG</i> _F                   | tttttctagaGGACTGGCTGGGACACAA                  |                                                            |
| C_ <i>katG</i> _R                   | tttttctagaAAATCGCGCCGGGCAAAC                  | Primers for <i>katG</i> site-directed mutagenesis          |
| MSD_ <i>katG</i> _F                 | CGGTAAGGACGCGATCACCACCGGCATCGAG<br>GTCGTATGG  |                                                            |
| MSD_ <i>katG</i> _R                 | CCATACGACCTCGATGCCGGTGGTGCATCGCG<br>TCCTTACCG |                                                            |

**Supplementary Table S2.** Evaluation of IQG-607 in combination with other drugs by the checkerboard assay.

| <b>Compound</b> | <b><math>\Sigma</math>FIC<sup>a</sup></b> | <b>Outcome<sup>b</sup></b> |
|-----------------|-------------------------------------------|----------------------------|
| Rifampicin      | 2                                         | Indifferent                |
| Ethambutol      | 1                                         | Indifferent                |
| Moxifloxacin    | 1                                         | Indifferent                |
| Streptomycin    | 1                                         | Indifferent                |
| Pyrazinamide    | 1                                         | Indifferent                |
| D-cycloserine   | 2                                         | Indifferent                |

<sup>a</sup>Fractional inhibitory index ( $\Sigma$ FIC) were calculated based on the results from three independent experiments. <sup>b</sup> $\Sigma$ FICs of  $\leq 0.5$  suggest synergy and  $\geq 4.0$  indicates antagonism; values between suggest that both drugs act independently (indifferent). The highest concentration for each compound was: 10 mg/L for streptomycin, ethambutol and IQG-607; 50 mg/L for D-cycloserine and pyrazinamide; 0.3 mg/L for rifampicin and moxifloxacin.
